# Supplementary material for: Healthful Eating Behaviors among Couples Contribute to Lower Gestational Weight Gain
Source: MDPI journal article supplement (doi:10.3390/nu16060822), 2024-03-13
Supplement: s1 [file s1]

**Figure S1. Analytic Sample Flow Diagram**

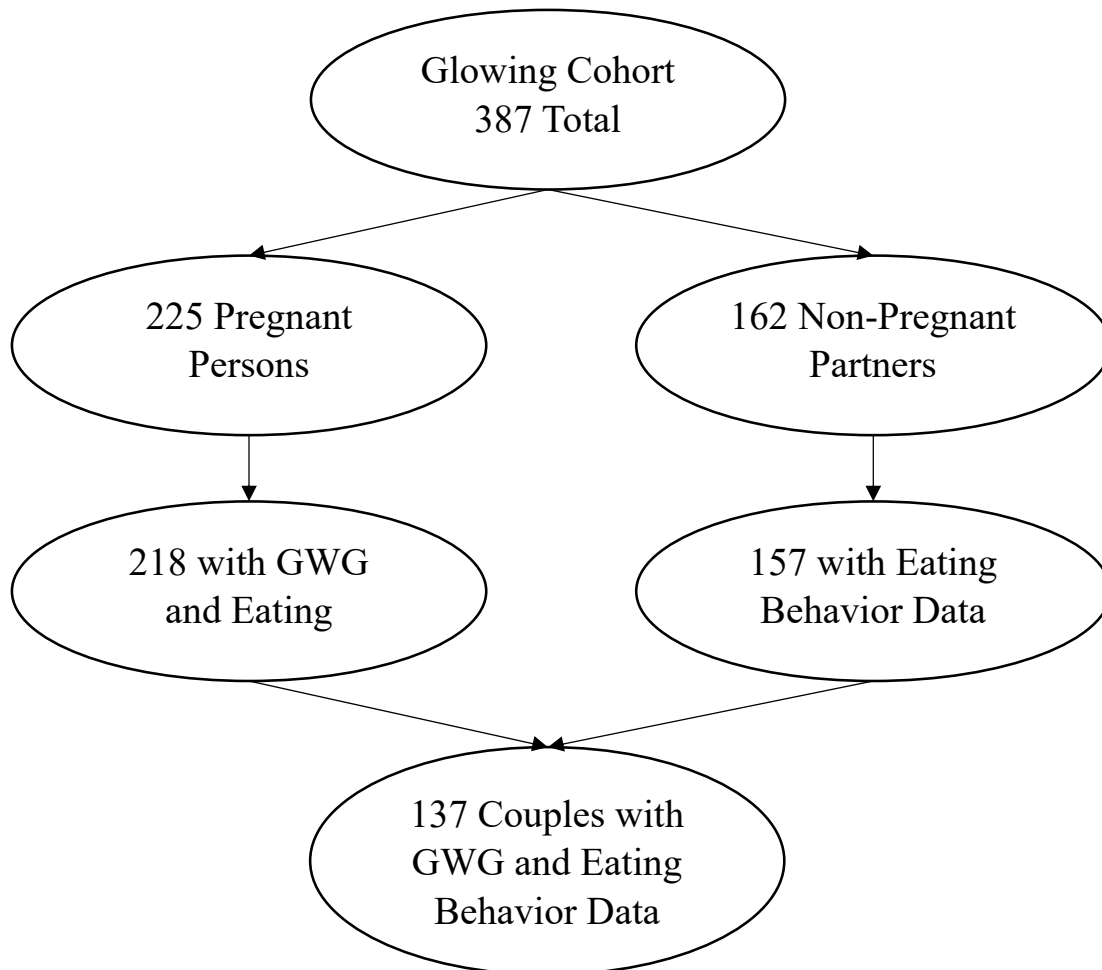

| <b>Table S1. Baseline Characteristics of Non-Pregnant Partner by Enrollment</b> |                          |                          |                |
|---------------------------------------------------------------------------------|--------------------------|--------------------------|----------------|
|                                                                                 | <b>Pregnancy (n=131)</b> | <b>Postpartum (n=26)</b> | <b>p-value</b> |
| <b>Age (Mean±SD)</b>                                                            | 30.8±4.0                 | 33.0±4.5                 | <b>0.007</b>   |
| <b>Body Mass Index (BMI; kg/m<sup>2</sup>; Mean±SD)</b>                         | 28.5±5.2                 | 28.7±4.5                 | 0.834          |
| Normal Weight, N(%)                                                             | 35 (26.7)                | 7 (29.3)                 | 0.954          |
| Overweight, N(%)                                                                | 54 (40.6)                | 10 (39.0)                |                |
| Obesity, N(%)                                                                   | 42 (32.7)                | 9 (31.7)                 |                |
| <b>Race</b>                                                                     |                          |                          | 0.284          |
| White/Caucasian, N(%)                                                           | 117 (89.0)               | 22 (85.4)                |                |
| Black/African American, N(%)                                                    | 14 (11.0)                | 3 (12.2)                 |                |
| Asian or more than One Race, N(%)                                               | 0 (0.0)                  | 1 (2.4)                  |                |
| Unknown or Not Reported, N(%)                                                   | 0 (0.0)                  | 0 (0.0)                  |                |
| <b>Highest Education Completed</b>                                              |                          |                          | 0.178          |
| <College Graduate, N(%)                                                         | 56 (42.7)                | 15 (59.0)                |                |
| ≥College Graduate, N(%)                                                         | 72 (55.2)                | 11 (41.0)                |                |
| Unknown/Not Reported, N(%)                                                      | 3 (2.1)                  | 0 (0.0)                  |                |
| <b>Individual Income</b>                                                        |                          |                          | 0.229          |
| <\$40,000 USD, N(%)                                                             | 42 (31.7)                | 15 (59.0)                |                |
| ≥\$40,000 USD, N(%)                                                             | 83 (63.4)                | 11 (41.0)                |                |
| Unknown/Not Reported, N(%)                                                      | 6 (4.9)                  | 0 (0.0)                  |                |
| <b>The Eating Inventory</b>                                                     |                          |                          |                |
| Cognitive Restraint, M±SD                                                       | 6.6±4.8                  | 7.0±4.5                  | 0.625          |
| Low, N(%)                                                                       | 102 (78.2)               | 22 (82.9)                | 0.528          |
| High, N(%)                                                                      | 29 (21.8)                | 4 (17.1)                 |                |
| Dietary Disinhibition, M±SD                                                     | 5.4±3.1                  | 5.0±4.0                  | 0.534          |
| Low, N(%)                                                                       | 113 (86.1)               | 22 (82.9)                | 0.625          |
| High, N(%)                                                                      | 18 (13.9)                | 4 (17.1)                 |                |
| Perceived Hunger, M±SD                                                          | 4.8±3.2                  | 4.5±2.9                  | 0.677          |
| Low, N(%)                                                                       | 104 (79.2)               | 22 (82.9)                | 0.614          |
| High, N(%)                                                                      | 27 (20.8)                | 4 (17.1)                 |                |
| Reported as N (%) if not otherwise noted.                                       |                          |                          |                |

| <b>Table S2. Baseline Characteristics of Pregnant Persons and Non-Pregnant Partners</b>     |                                    |                                         |                |
|---------------------------------------------------------------------------------------------|------------------------------------|-----------------------------------------|----------------|
|                                                                                             | <b>Pregnant Person<br/>(n=137)</b> | <b>Non-Pregnant<br/>Partner (n=137)</b> | <b>p-value</b> |
| <b>Age (Mean±SD)</b>                                                                        | 30.0±3.7                           | 31.4±4.3                                | 0.07           |
| <b>Body Mass Index (BMI;<br/>kg/m<sup>2</sup>; Mean±SD)</b>                                 | 26.1±4.3                           | 28.5±5.3                                | <0.0001        |
| Normal Weight, N(%)                                                                         | 62 (45.3)                          | 39 (28.5)                               |                |
| Overweight, N(%)                                                                            | 44 (32.1)                          | 55 (40.1)                               |                |
| Obesity, N(%)                                                                               | 31 (22.6)                          | 43 (31.4)                               |                |
| <b>Marital Status*</b>                                                                      |                                    |                                         |                |
| Married or Cohabiting, N(%)                                                                 | 125 (91.2)                         | -                                       |                |
| Single, Divorced, or<br>Unknown/Not Reported, N(%)                                          | 12 (8.8)                           | -                                       |                |
| <b>Race</b>                                                                                 |                                    |                                         | 0.70           |
| White/Caucasian, N(%)                                                                       | 112 (81.7)                         | 110 (80.3)                              |                |
| Black/African American, N(%)                                                                | 12 (8.8)                           | 16 (11.7)                               |                |
| Asian or more than One Race,<br>N(%)                                                        | 2 (1.5)                            | 0 (0.0)                                 |                |
| Unknown or Not Reported,<br>N(%)                                                            | 11 (8.0)                           | 11 (8.0)                                |                |
| <b>Highest Education<br/>Completed</b>                                                      |                                    |                                         | <0.01          |
| <College Graduate, N(%)                                                                     | 46 (33.6)                          | 54 (39.4)                               |                |
| ≥College Graduate, N(%)                                                                     | 81 (59.1)                          | 64 (46.7)                               |                |
| Unknown/Not Reported, N(%)                                                                  | 10 (7.3)                           | 19 (13.9)                               |                |
| <b>Individual Income</b>                                                                    |                                    |                                         | <0.01          |
| <\$40,000 USD, N(%)                                                                         | 67 (48.9)                          | 42 (30.7)                               |                |
| ≥\$40,000 USD, N(%)                                                                         | 40 (29.2)                          | 80 (58.4)                               |                |
| Unknown/Not Reported, N(%)                                                                  | 30 (21.9)                          | 15 (10.9)                               |                |
| Reported as N (%) if not otherwise noted. *Marital Status only reported by Pregnant Persons |                                    |                                         |                |

| <b>Table S3. Gestational Weight Gain and The Eating Inventory Overall and by Body Mass Index</b>                                                                                                                                                                                                                                                                        |                         |                        |                 |            |
|-------------------------------------------------------------------------------------------------------------------------------------------------------------------------------------------------------------------------------------------------------------------------------------------------------------------------------------------------------------------------|-------------------------|------------------------|-----------------|------------|
| <b>Pregnant Person</b>                                                                                                                                                                                                                                                                                                                                                  | Overall (137)           | Normal Weight (62)     | Overweight (44) | Obese (31) |
| <b>Gestational Weight Gain (Total; kg)</b>                                                                                                                                                                                                                                                                                                                              | 11.5±4.4                | 13.1±3.0*              | 11.4±4.9*       | 8.6±4.6    |
| Inadequate, N(%)                                                                                                                                                                                                                                                                                                                                                        | 51 (37.2)               | 38 (61.3) <sup>‡</sup> | 7 (15.9)        | 6 (19.4)   |
| Recommended, N(%)                                                                                                                                                                                                                                                                                                                                                       | 62 (45.3)               | 24 (38.7) <sup>‡</sup> | 23 (52.3)       | 15 (48.4)  |
| Excess, N(%)                                                                                                                                                                                                                                                                                                                                                            | 24 (17.5)               | 0 (0.0) <sup>‡</sup>   | 14 (31.8)       | 10 (32.3)  |
| <b>The Eating Inventory</b>                                                                                                                                                                                                                                                                                                                                             |                         |                        |                 |            |
| Cognitive Restraint, M±SD                                                                                                                                                                                                                                                                                                                                               | 9.9±4.7 <sup>‡</sup>    | 9.0±4.7 <sup>‡</sup>   | 10.5±4.8        | 10.6±4.3   |
| Low, N(%)                                                                                                                                                                                                                                                                                                                                                               | 73 (53.3) <sup>‡</sup>  | 36 (58.1) <sup>‡</sup> | 20 (45.5)       | 17 (54.8)  |
| High, N(%)                                                                                                                                                                                                                                                                                                                                                              | 64 (46.7) <sup>‡</sup>  | 26 (41.9) <sup>‡</sup> | 24 (54.5)       | 14 (45.2)  |
| Dietary Disinhibition, M±SD                                                                                                                                                                                                                                                                                                                                             | 4.6±3.1                 | 3.0±2.1 <sup>‡</sup>   | 5.5±3.0         | 6.3±3.7    |
| Low, N(%)                                                                                                                                                                                                                                                                                                                                                               | 122 (89.1)              | 61 (98.4) <sup>‡</sup> | 37 (84.1)       | 24 (77.4)  |
| High, N(%)                                                                                                                                                                                                                                                                                                                                                              | 15 (10.9)               | 1 (1.6) <sup>‡</sup>   | 15 (15.9)       | 7 (22.6)   |
| Perceived Hunger, M±SD                                                                                                                                                                                                                                                                                                                                                  | 4.6±2.6                 | 4.0±2.3 <sup>‡</sup>   | 5.3±2.7         | 4.9±2.8    |
| Low, N(%)                                                                                                                                                                                                                                                                                                                                                               | 119 (86.9)              | 58 (93.6) <sup>‡</sup> | 34 (77.3)       | 27 (87.1)  |
| High, N(%)                                                                                                                                                                                                                                                                                                                                                              | 18 (13.1)               | 4 (6.5) <sup>‡</sup>   | 10 (22.7)       | 7 (12.9)   |
| <b>Non-Pregnant Partner</b>                                                                                                                                                                                                                                                                                                                                             | Overall (137)           | Normal Weight (62)     | Overweight (44) | Obese (31) |
| <b>The Eating Inventory</b>                                                                                                                                                                                                                                                                                                                                             |                         |                        |                 |            |
| Cognitive Restraint, M±SD                                                                                                                                                                                                                                                                                                                                               | 6.7±4.6 <sup>‡</sup>    | 6.8±4.8                | 6.9±4.3         | 6.2±4.9    |
| Low, N(%)                                                                                                                                                                                                                                                                                                                                                               | 110 (80.3) <sup>‡</sup> | 51 (82.3)              | 35 (79.5)       | 24 (77.4)  |
| High, N(%)                                                                                                                                                                                                                                                                                                                                                              | 27 (19.7) <sup>‡</sup>  | 11 (17.7)              | 9 (20.5)        | 7 (22.6)   |
| Dietary Disinhibition, M±SD                                                                                                                                                                                                                                                                                                                                             | 5.2±3.4                 | 5.1±3.2                | 4.8±3.2         | 5.9±3.9    |
| Low, N(%)                                                                                                                                                                                                                                                                                                                                                               | 120 (87.6)              | 56 (90.3)              | 39 (88.6)       | 25 (80.7)  |
| High, N(%)                                                                                                                                                                                                                                                                                                                                                              | 17 (12.4)               | 6 (9.7)                | 5 (11.4)        | 6 (19.3)   |
| Perceived Hunger, M±SD                                                                                                                                                                                                                                                                                                                                                  | 4.7±3.2                 | 4.3±3.2                | 4.7±2.9         | 5.4±3.5    |
| Low, N(%)                                                                                                                                                                                                                                                                                                                                                               | 111 (81.0)              | 53 (85.5)              | 35 (79.5)       | 23 (74.2)  |
| High, N(%)                                                                                                                                                                                                                                                                                                                                                              | 29 (19.0)               | 9 (14.5)               | 9 (20.5)        | 8 (25.8)   |
| <b>Couple (Average)</b>                                                                                                                                                                                                                                                                                                                                                 | Overall (137)           | Normal Weight (62)     | Overweight (44) | Obese (31) |
| <b>The Eating Inventory</b>                                                                                                                                                                                                                                                                                                                                             |                         |                        |                 |            |
| Cognitive Restraint, M±SD                                                                                                                                                                                                                                                                                                                                               | 8.3±3.4                 | 7.9±3.5                | 8.7±3.3         | 8.4±3.2    |
| Low, N(%)                                                                                                                                                                                                                                                                                                                                                               | 100 (73.0)              | 48 (77.4)              | 30 (68.2)       | 22 (71.0)  |
| High, N(%)                                                                                                                                                                                                                                                                                                                                                              | 37 (27.0)               | 14 (22.6)              | 14 (31.8)       | 9 (29.0)   |
| Dietary Disinhibition, M±SD                                                                                                                                                                                                                                                                                                                                             | 4.9±2.4                 | 4.1±2.0                | 5.2±2.2         | 6.1±2.7    |
| Low, N(%)                                                                                                                                                                                                                                                                                                                                                               | 125 (91.2)              | 60 (96.8)              | 40 (90.9)       | 25 (80.6)  |
| High, N(%)                                                                                                                                                                                                                                                                                                                                                              | 12 (8.8)                | 2 (3.2)                | 4 (9.1)         | 6 (19.4)   |
| Perceived Hunger, M±SD                                                                                                                                                                                                                                                                                                                                                  | 4.6±2.0                 | 4.1±1.8                | 5.0±2.0         | 5.1±2.3    |
| Low, N(%)                                                                                                                                                                                                                                                                                                                                                               | 130 (94.9)              | 60 (96.8)              | 42 (95.5)       | 28 (90.3)  |
| High, N(%)                                                                                                                                                                                                                                                                                                                                                              | 7 (5.1)                 | 2 (3.2)                | 2 (4.5)         | 3 (9.7)    |
| Parent average was calculated the average between pregnant person and non-pregnant partner Eating Inventory.<br>*p<0.05 for significance compared to those having obesity; <sup>‡</sup> p<0.05 for significance compared to those having overweight or obesity; <sup>‡</sup> p<0.05 for significance compared between maternal and paternal Eating Inventory constructs |                         |                        |                 |            |
